# Supplementary material for: Environmentally friendly nanocrystalline magnesium hydride decorated with metallic glassy-zirconium palladium nanopowders for fuel cell applications
Source: Royal Society of Chemistry journal article supplement (doi:10.1039/c9ra05121j), 2019-01-01
Supplement: c9ra05121j1.pdf [file c9ra05121j1.pdf]

**Table S1. Doping effect of selected Metallic–Based Catalysts on the hydrogen Storage Characteristics and Kinetics Behavior of MgH<sub>2</sub> Powders\***

| Catalysts                                                                | Dose (wt%) | Doping technique                                                           | Storage capacity (wt%)/pressure (bar)/Temp. (°C)/time (min) | E <sub>a</sub> of deco (kJ/mol) | Ref. |
|--------------------------------------------------------------------------|------------|----------------------------------------------------------------------------|-------------------------------------------------------------|---------------------------------|------|
| <b>Pure Metals</b>                                                       |            |                                                                            |                                                             |                                 |      |
| Ni-nanofibers                                                            | 10         | Ar- HEBM/4h                                                                | Abs: 5/10/350 /6.1<br>Des: NA                               | 72                              | 14   |
| Zr                                                                       | 1 at%      | H <sub>2</sub> -RBM/20 h + annealing at 100 °C/40 bar H <sub>2</sub> /24 h | Abs: 3.5/10/100/100<br>Des: 5.5/0.2/350/20                  | 40                              | 15   |
| Nb-NPs                                                                   | 7.5        | hydrogen plasma-metal reaction                                             | Abs: 5.7/40/200/60<br>Des: 4/NA/300/60                      | 86.4                            | 16   |
| <b>Intermetallic compounds and alloys</b>                                |            |                                                                            |                                                             |                                 |      |
| Ti <sub>0.4</sub> Cr <sub>0.15</sub> Mn <sub>0.15</sub> V <sub>0.3</sub> | 20         | Ar- HEBM/3 h                                                               | Abs: 6.5/20/350/300                                         | 71.2                            | 17   |
| ZrCrNi                                                                   | 10         | Ar- HEBM/6 h                                                               | Abs: 5.8/5/300/30<br>Des: 5.8/0.1/300/45                    | NA                              | 18   |
| TiAl                                                                     | 14         | H <sub>2</sub> -RBM/4 h                                                    | Abs: 4/1/100/30<br>Des: 4/0.1/240/7                         | 65                              | 19   |
| LaNi <sub>5</sub>                                                        | 5          | H <sub>2</sub> -RBM/40 h                                                   | Abs: 5.1/20/285/45<br>Des: 5.1/0.1/285/30                   | NA                              | 20   |
| ZrNi <sub>5</sub>                                                        | 10         | H <sub>2</sub> -RBM/50 h                                                   | Abs: 5.3/10/250/30<br>Des: 5.3/0.2/250/15                   | NA                              | 21   |
| <b>Metallic glasses</b>                                                  |            |                                                                            |                                                             |                                 |      |
| Zr <sub>70</sub> Ni <sub>20</sub> Pd <sub>10</sub>                       | 10         | Cryo-milling/50 h                                                          | Abs: 6/10/100/1.18<br>Des: 6/0.2/200/3.8                    | 92                              | 22   |
| Zr <sub>2</sub> Ni                                                       | 10         | Cryo-milling/50 h                                                          | Abs: 6/10/250/1.15<br>Des: 6/0.2/250/2.5                    | 83                              | 23   |
| Ti <sub>2</sub> Ni                                                       | 10         | Cryo-milling/25 h                                                          | Abs: 5.7/10/225/6.7<br>Des: 5.7/0.2/250/6.7                 | 87.3                            | 24   |
| LaNi <sub>3</sub>                                                        | 7          | Cryo-milling/50 h + 100 h of rod-milling                                   | Abs: 6/10/200/8<br>Des: 6/0.2/225/2                         | 73.26                           | 25   |
| <b>Quasicrystal metastable phase</b>                                     |            |                                                                            |                                                             |                                 |      |
| Al <sub>65</sub> Cu <sub>20</sub> Fe <sub>15</sub>                       |            | Ar- HEBM/40 h                                                              | Abs: 6/10/250/0.5<br>Des: 6.25/0.2/324/2.7                  | 64.25                           | 26   |

\*NPs: nanoparticles; HEBM: high-energy ball milling; RBM: reactive ball milling;  
Abs: absorption; Des: desorption;  
Deco: decomposition; NA: not available.

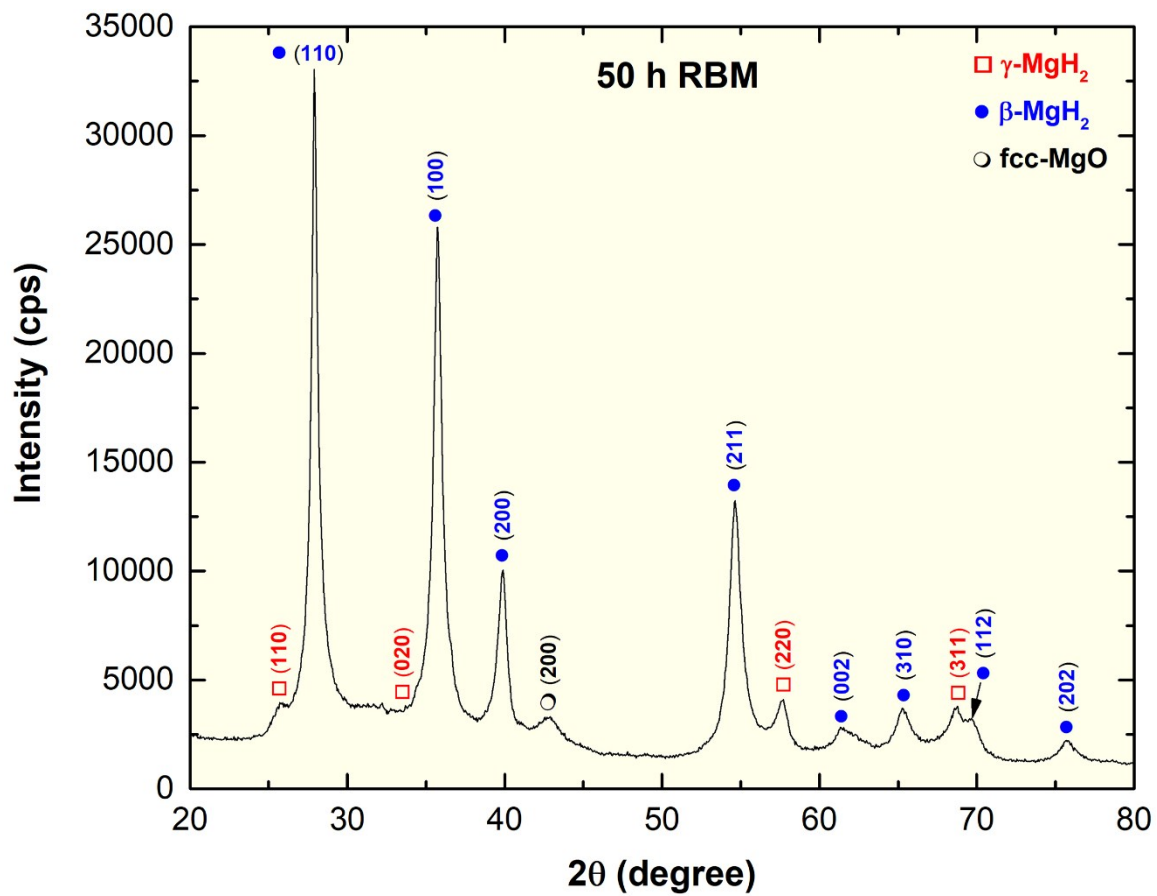

Figure S1. XRD patterns of MgH<sub>2</sub> powders obtained after 50 h of RBM time.
